# Supplementary material for: Dopaminergic Neurodegeneration in the Mouse Is Associated with Decrease of Viscoelasticity of Substantia Nigra Tissue
Source: PubMed Central journal article supplement (PMC4985068; doi:10.1371/journal.pone.0161179), 2016-08-15
Supplement: pone.0161179.s002.pdf [file pone.0161179.s002.pdf]

**S2 Table.** Results of histological cell count in the substantia nigra, the midbrain and the hippocampus.

| Post-injection day (dpi) | TH+ cells in the substantia nigra |      |      |      |      | Iba-1+ cells in the substantia nigra |       |       |       |       |
|--------------------------|-----------------------------------|------|------|------|------|--------------------------------------|-------|-------|-------|-------|
|                          |                                   |      |      |      |      |                                      |       |       |       |       |
| -3                       | 1752                              | 2202 |      | 1776 | 2340 | 16470                                | 14280 |       | 29610 | 17700 |
| 3                        | 1080                              | 342  | 1026 | 576  | 1254 | 20280                                | 18570 | 16350 | 16140 | 16260 |
| 6                        | 972                               | 1080 | 828  | 1080 | 432  | 15090                                | 17400 | 15480 | 17790 | 15000 |
| 10                       | 642                               | 1188 | 1464 | 444  | 1092 | 15480                                | 16710 | 13920 | 17070 | 14610 |
| 14                       | 1146                              | 1212 | 1146 | 546  | 924  | 15480                                | 16710 | 13920 | 17070 | 14610 |
| 18                       | 1044                              | 1116 | 1260 | 1104 | 456  | 16320                                | 13770 | 14120 | 14700 | 14370 |

| Post-injection day (dpi) | DAPI+ cells      |        |          |         |             |         |
|--------------------------|------------------|--------|----------|---------|-------------|---------|
|                          | Substantia nigra |        | Midbrain |         | Hippocampus |         |
| -3                       | 217733           | 231666 | 1718400  | 1951200 | 1540800     | 1230000 |
| 3                        | 228833           | 188833 | 2107200  | 1766400 | 1204800     | 1202400 |
| 6                        | 155666           | 172500 | 1273200  | 1294400 | 1378800     | 1557600 |
| 10                       | 182833           | 186333 | 1591200  | 1572000 | 1068000     | 996000  |
| 14                       | 179500           | 218500 | 999600   | 1917600 | 1240800     | 946800  |
| 18                       | 165500           | 187833 | 1611600  | 1530000 | 1262400     | 1122000 |

Dopaminergic neurodegeneration in the mouse is associated with decrease of viscoelasticity of substantia nigra tissue.  
Hain EG, Klein C, Munder T, Braun J, Riek K, Mueller S, Sack I, Steiner B.
